# Supplementary material for: Overcoming tolerance to tumour-antigens using molecularly informed epitope-modification to expand restructured oligoclonal CD4+ T-cell responses
Source: Research Square preprint supplement (doi:10.21203/rs.3.rs-6766731/v1), 2025-06-04
Supplement: Supplementary file 1 [file 2bf261e79d7714cd246be3d4.pdf]

**Table 1a. Details of healthy donors**

| Donor No.  | Gender | Age Range (Years)* | HLA-DR type            |
|------------|--------|--------------------|------------------------|
| Healthy 01 | Male   | 21-30              | DRB1*03(DR17), DRB1*04 |
| Healthy 02 | Female | 21-30              | DRB1*04, DRB1*13       |
| Healthy 03 | Female | 31-40              | DRB1*04, DRB1*14       |
| Healthy 04 | Female | 31-40              | DRB1*04, DRB1*14       |
| Healthy 05 | Male   | 31-40              | DRB1*04, DRB1*08       |
| Healthy 06 | Male   | 41-50              | DRB1*04, DRB1*04       |
| Healthy 07 | Female | 31-40              | DRB1*04, DRB1*04       |
| Healthy 08 | Male   | 41-50              | DRB1*04, DRB1*07       |
| Healthy 09 | Female | 31-40              | DRB1*03(DR17), DRB1*04 |
| Healthy 11 | Male   | 31-40              | DRB1*04, DRB1*15       |
| Healthy 12 | Male   | 41-50              | DRB1*0103, DRB1*13     |
| Healthy 13 | Male   | 21-30              | DRB1*0103, DRB1*15     |
| Healthy 14 | Male   | 51-60              | DRB1*01, DRB1*09       |
| Healthy 15 | Male   | 41-50              | DRB1*01, DRB1*12       |
| Healthy 16 | Female | 31-40              | DRB1*01, DRB1*15       |
| Healthy 17 | Female | 51-60              | DRB1*03(DR17), DRB1*07 |
| Healthy 18 | Female | 41-50              | DRB1*03(DR17), DRB1*07 |
| Healthy 19 | Male   | 31-40              | DRB1*03(DR17), DRB1*03 |

\*Subjects donated blood samples > once, therefore age range given.

**Table 1b. Details of colorectal cancer patients.**

| Donor No. | Gender | Age (Years) | HLA-DR type        | Stage               | Treatment                                       | Histology diagnosis      | Time of sample collection |
|-----------|--------|-------------|--------------------|---------------------|-------------------------------------------------|--------------------------|---------------------------|
| CRC01     | Female | 73          | DRB1*04<br>DRB1*15 | T3N0M0<br>Stage III | Surgery + 6 months<br>adjuvant<br>chemotherapy  | adenocarcinoma           | 7 years after<br>surgery  |
| CRC02     | Male   | 80          | DRB1*04<br>DRB1*15 | T3N2M0<br>Stage III | Surgery + 6 months<br>adjuvant<br>chemotherapy  | adenocarcinoma           | 8 years after<br>surgery  |
| CRC03     | Male   | 72          | DRB1*04<br>DRB1*07 | T3N1M0<br>Stage III | Surgery + 3 months<br>adjuvant<br>chemotherapy* | adenocarcinoma           | 9 years after<br>surgery  |
| CRC04     | Male   | 69          | DRB1*01<br>DRB1*04 | T2N0M0<br>Stage II  | Surgery                                         | adenocarcinoma           | During<br>surgery         |
| CRC05     | Male   | 83          | DRB1*01<br>DRB1*04 | T3N0M0<br>Stage III | Surgery                                         | adenocarcinoma           | During<br>surgery         |
| CRC06     | Male   | 63          | DRB1*04<br>DRB1*15 | T2N0M0S<br>tage II  | Surgery                                         | Square cell<br>carcinoma | During<br>surgery         |
| CRC07     | Male   | 69          | DRB1*03<br>DRB1*04 | T3N0M0S<br>tage III | Surgery                                         | adenocarcinoma           | During<br>surgery         |
| CRC08     | Male   | 72          | DRB1*01<br>DRB1*04 | T3N1M0S<br>tage III | Surgery                                         | adenocarcinoma           | During<br>surgery         |
| CRC09     | Male   | 72          | DRB1*03<br>DRB1*04 | T2N0M0S<br>tage II  | Surgery                                         | adenocarcinoma           | During<br>surgery         |

|       |      |    |                    |                     |         |                |                   |
|-------|------|----|--------------------|---------------------|---------|----------------|-------------------|
| CRC10 | Male | 76 | DRB1*04<br>DRB1*04 | T3N0M0S<br>tage III | Surgery | adenocarcinoma | During<br>surgery |
| CRC11 | Male | 66 | DRB1*03<br>DRB1*04 | T2N0M0S<br>tage II  | Surgery | adenocarcinoma | During<br>surgery |
| CRC12 | Male | 62 | DRB1*04<br>DRB1*11 | T3N1M0S<br>tage III | Surgery | adenocarcinoma | During<br>surgery |

\*Standard 6 months chemotherapy did not finish due to intolerance.

**Table 2a Sequence of overlapping DNAJB7 peptides**

| peptide label | DNAJB7 overlapping peptide sequence |
|---------------|-------------------------------------|
| 1             | MVDYYEVLGLQRYASPEDIK                |
| 2             | QRYASPEDIKKAYHKVALKW                |
| 3             | KAYHKVALKWHPDKNPENKE                |
| 4             | HPDKNPENKEEAERKFKEVA                |
| 5             | EAERKFKEVAEAYEVLNDE                 |
| 6             | EAYEVLNDEKRDYDKYGT                  |
| 7             | KRDYDKYGTGLNGGGSHF                  |
| 8             | EGLNGGGSHFDDECEYGFTF                |
| 9             | DDECEYGFTFHKPDDVFKEI                |
| 10            | HKPDDVFKEIFHERDPFSFH                |
| 11            | FHERDPFSFHFFEDSLEDLL                |
| 12            | FFEDSLEDLLNRPGSSYGNR                |
| 13            | NRPGSSYGNRNRDAGYFFST                |
| 14            | NRDAGYFFSTASEYPIFEKF                |
| 15            | ASEYPIFEKFSSYDTGYTSQ                |
| 16            | SSYDTGYTSQGSLGHEGLTS                |
| 17            | GSLGHEGLTSFSSLAFDMSG                |
| 18            | FSSLAFDMSGMDNYISVTTS                |
| 19            | MDNYISVTTS DKIVNGRNIN               |
| 20            | DKIVNGRNINTKKIIESDQE                |
| 21            | TKKIIESDQEREAEDNGELT                |
| 22            | REAEDNGELTFFLVNSVANE                |
| 23            | FFLVNSVANEEGFAKECSWR                |
| 24            | EGFAKECSWRTQSFNNYSPN                |
| 25            | TQSFNNYSPNSHSSKHVSQY                |
| 26            | SHSSKHVSQYTFVDNDEGGI                |
| 27            | TFVDNDEGGISWVTSNRDPP                |
| 28            | SWVTSNRDPPIFSAGVKEGG                |
| 29            | IFSAGVKEGGKRKKKKRKEV                |
| 30            | KRKKKKRKEVQKKSTKRNC                 |

**Table 2b Sequence of truncated peptides of P23 and P25**

| P23 truncated peptide sequence | P25 truncated peptide sequence |
|--------------------------------|--------------------------------|
| FFLVNSVANEEGFAKECSWR           | TQSFNNYSPNSHSSKHVSQY           |
| FFLVNSVANEEGFAKECSW            | TQSFNNYSPNSHSSKHVSQ            |
| FFLVNSVANEEGFAKECS             | TQSFNNYSPNSHSSKHVS             |
| FFLVNSVANEEGFAKEC              | TQSFNNYSPNSHSSKHV              |
| FFLVNSVANEEGFAKE               | TQSFNNYSPNSHSSKH               |
| FFLVNSVANEEGFAK                | TQSFNNYSPNSHSSK                |
| FFLVNSVANEEGFA                 | TQSFNNYSPNSHSS                 |
| FFLVNSVANEEGF                  | TQSFNNYSPNSHS                  |
| FFLVNSVANEEG                   | TQSFNNYSPNSH                   |
| FFLVNSVANEE                    | TQSFNNYSPNS                    |
| FLVNSVANEEGFAKECSWR            | QSFNNYSPNSHSSKHVSQY            |
| LVNSVANEEGFAKECSWR             | SFNNYSPNSHSSKHVSQY             |
| VNSVANEEGFAKECSWR              | FNNYSPNSHSSKHVSQY              |
| NSVANEEGFAKECSWR               | NNYSPNSHSSKHVSQY               |
| SVANEEGFAKECSWR                | NYSPNSHSSKHVSQY                |
| VANEEGFAKECSWR                 | YSPNSHSSKHVSQY                 |
| ANEEGFAKECSWR                  | SPNSHSSKHVSQY                  |
| NEEGFAKECSWR                   | PNSHSSKHVSQY                   |
| EEGFAKECSWR                    | NSHSSKHVSQY                    |

**Table 2c Sequence of flank modified peptides of P23 and P25**

| P23 flank modified peptides |                  | P25 flank modified peptides |                   |
|-----------------------------|------------------|-----------------------------|-------------------|
| peptide labels              | peptide sequence | peptide labels              | peptide sequence  |
| -2Y                         | FYLNSVANEEGFAK   | -2Y                         | TQYFNNYSPNSHSSKH  |
| -2E                         | FELNSVANEEGFAK   | -2E                         | TQEFNNYSPNSHSSKH  |
| -2L                         | FLLNSVANEEGFAK   | -2L                         | TQLFNNYSPNSHSSKH  |
| -2S                         | FSLNSVANEEGFAK   | -2T                         | TQTFNNYSPNSHSSKH  |
| -2R                         | FRLNSVANEEGFAK   | -2R                         | TQRFNNYSPNSHSSKH  |
| 11Y                         | FFLVNSVANEEGFYK  | 11Y                         | TQSFNNYSPNSHSSYH  |
| 11E                         | FFLVNSVANEEGF EK | 11E                         | TQSFNNYSPNSHSS EH |
| 11L                         | FFLVNSVANEEGFLK  | 11L                         | TQSFNNYSPNSHSSLH  |
| 11S                         | FFLVNSVANEEGF SK | 11S                         | TQSFNNYSPNSHSSSH  |
| 11R                         | FFLVNSVANEEGFRK  | 11R                         | TQSFNNYSPNSHSSRH  |

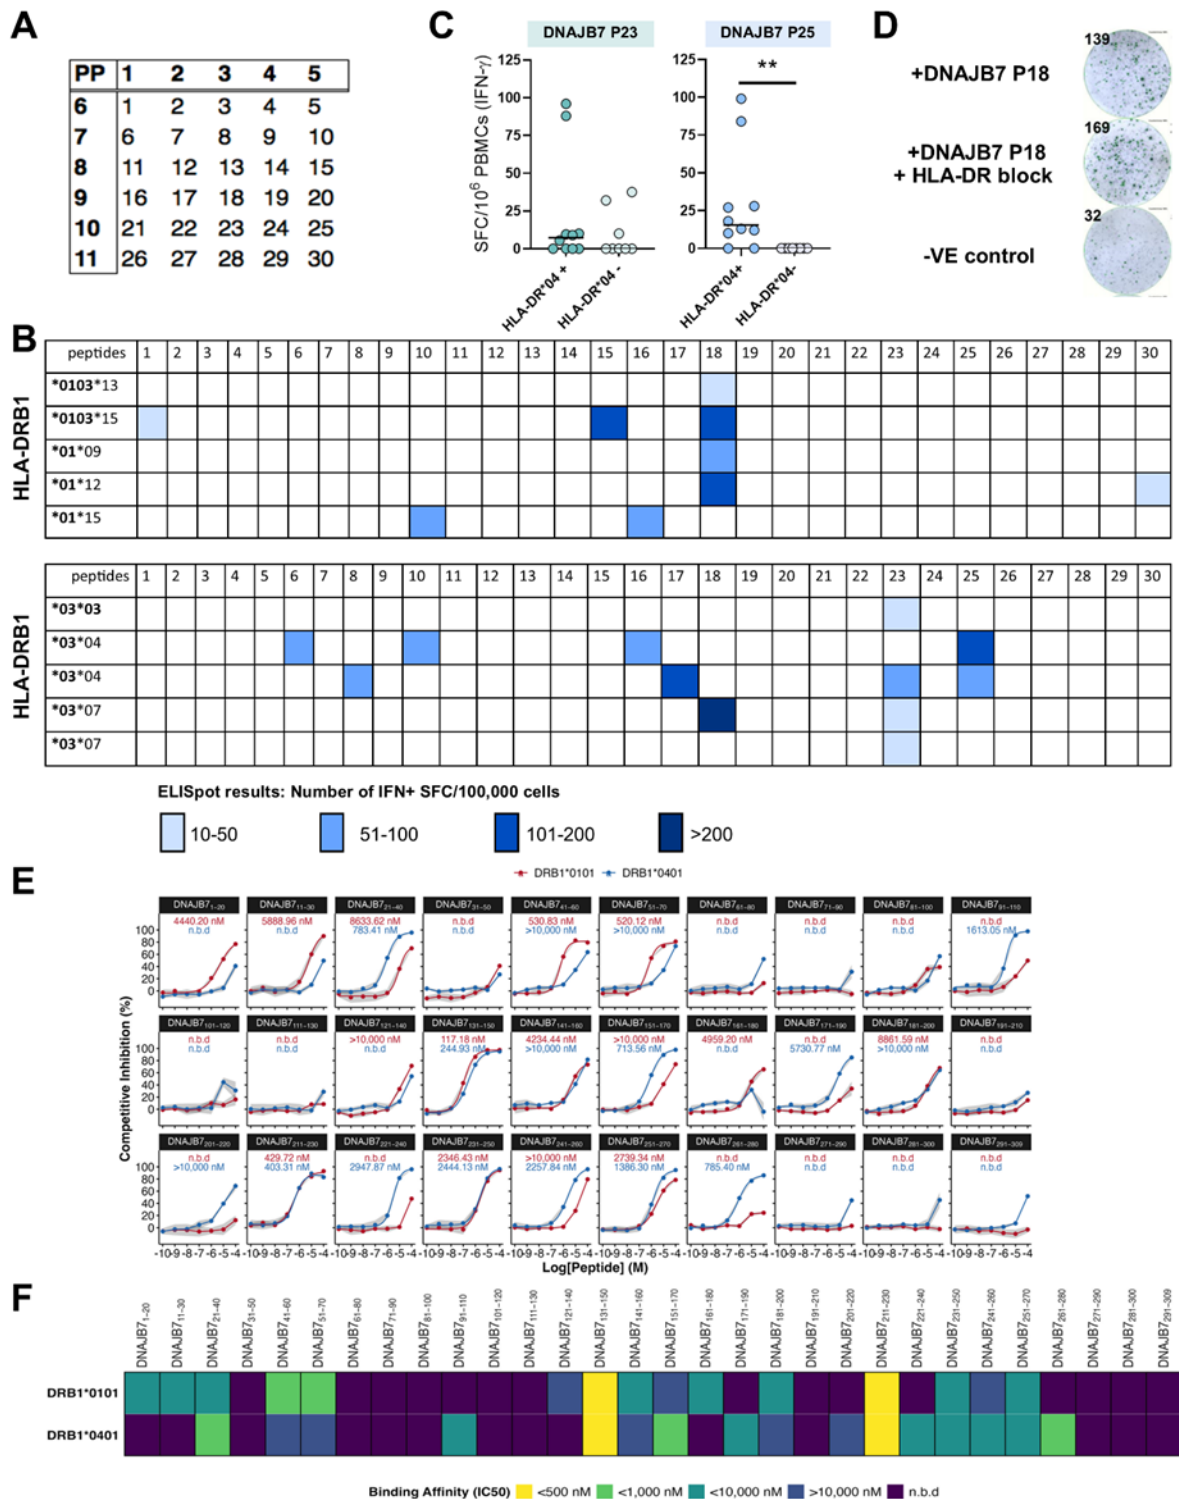

**Supplementary Figure 1. Mapping DNAJB7 CD4 T cell epitopes in HLA-DR1, DR3 and DR4 donors** (A) 30 overlapping DNAJB7 peptides (listed in Supplementary Table 2) were aliquoted into 11 peptide pools (B) Screening DNAJB7 T cell responses to peptides in HLA-DR1+ and DR3+ donors. (C) Summary of IFN- $\gamma$  ELISpot results of HLA-DR4+ donors (N=10) versus HLA-

DR4- donors (N=8) who responded to either P23 or P25, respectively. (D) Representative IFN- $\gamma$  ELISpot of T cells from HLA-DR1+ donors responded to DNAJB7 P18, with or without anti-HLA-DR blocking. (E) Competitive inhibition curves of DNAJB7 overlapping peptide library binding to HLA-DR1 (red) and HLA-DR4 (blue). Data representative of 2-3 independent experiments, each with 3 technical replicates. Representative replicate is shown, presented as mean percentage inhibition (circles) with standard deviation (shaded area). An  $IC_{50}$  value estimating binding affinity (inset) is shown where fitting resulted in values of  $<10 \mu M$  (curve fit, black line). Peptides with poor curve fit and weak binding ( $>10 \mu M$ ) or no binding detected (n.b.d.) have mean values that are connected via straight lines. (F) Summative heatmap of HLA-DR1 and HLA-DR4 binding  $IC_{50}$ s from experiments described in figure E.

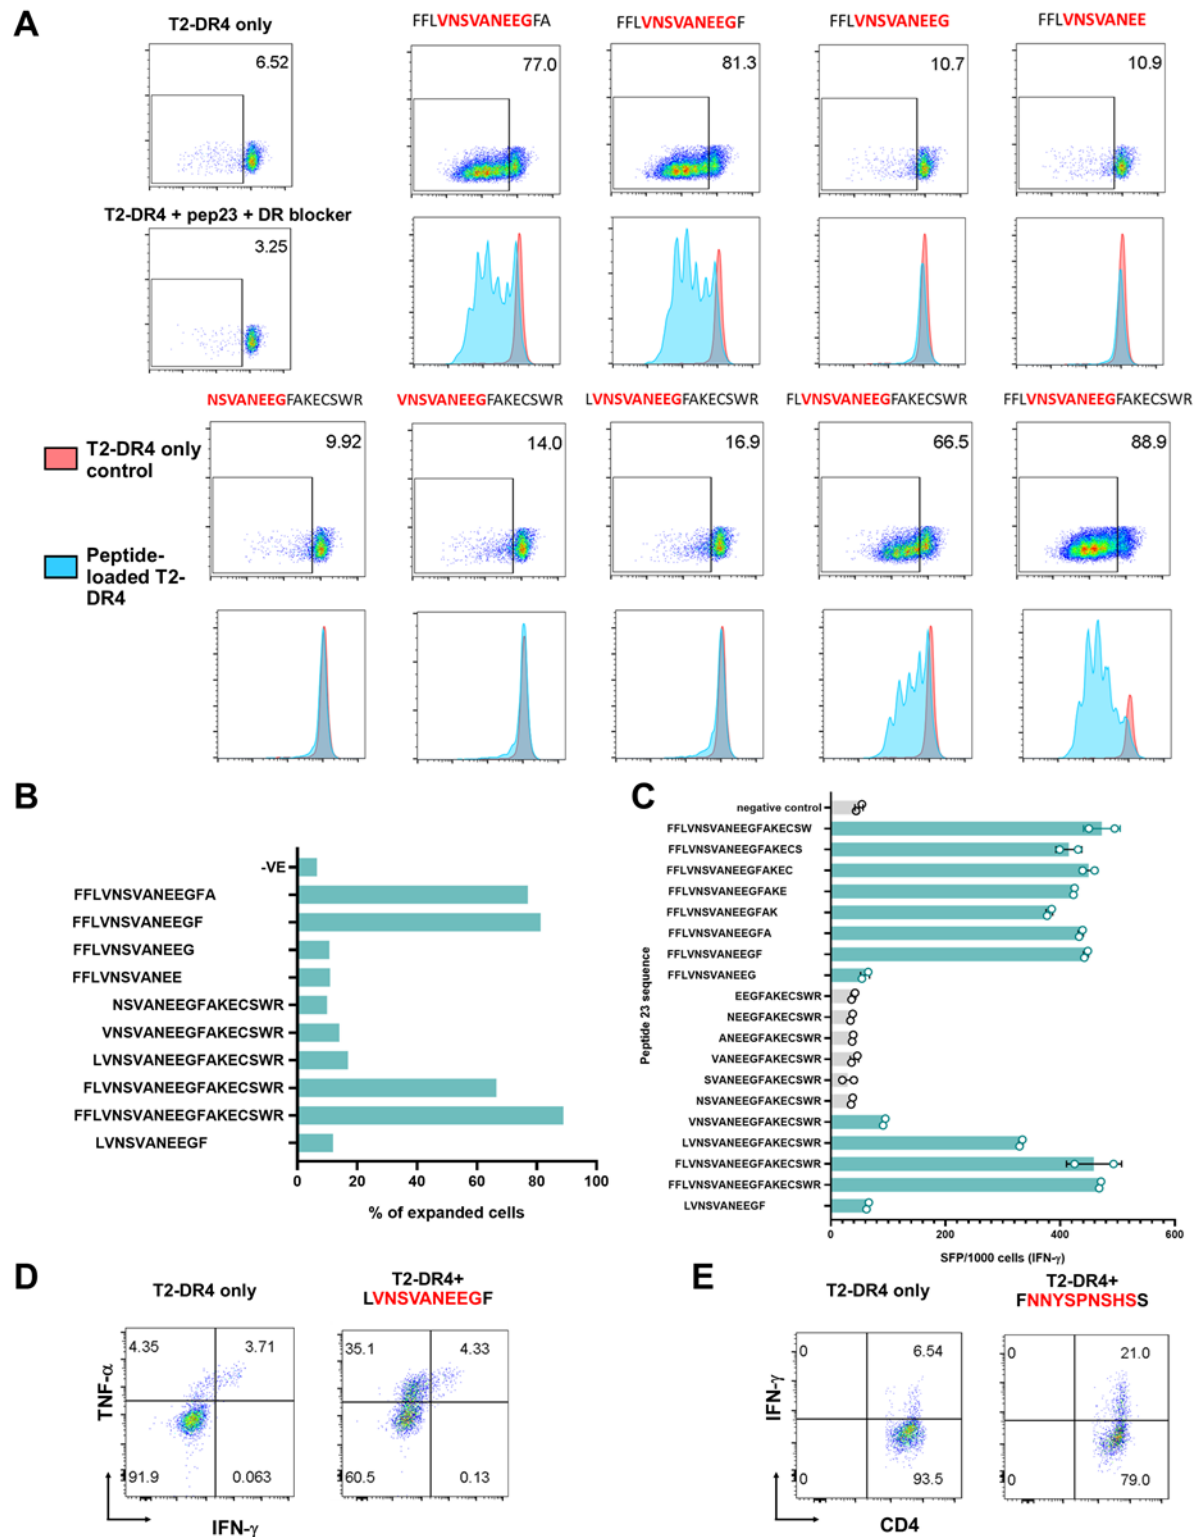

**Supplementary Figure 2. Analysis of epitope binding core of DNAJB7 P23 (DNAJB7<sub>221-240</sub>) using functional assays.** (A) DNAJB7 221-240 T cell line was labelled with Cell Trace Violet, and co-cultured with T2-DR4 cells (ratio 1:1) loaded with P23 (DNAJB7<sub>221-240</sub>) variants, comprising serial truncation from the N- and C-termini. T cell lines co-cultured with empty T2-DR4 cells,

and T2-DR4 cells pulsed with P23 (DNAJB7221-240), plus anti-HLA-DR blocking antibody were used as control. Dilution of trace violet was measured by flow cytometry on day 5. P23 (DNAJB7221-240) truncation analysis on P23 (DNAJB7221-240) specific CD4<sup>+</sup> T cell line from HC02. (B) P23-specific T cell lines were stimulated with peptide variants and proliferation measured. (C) Bar chart representing the percentage of ELISpot results of IFN- $\gamma$  producing CD4<sup>+</sup> T cell cultured with P23 (DNAJB7221-240) variant-pulsed T2-DR4 cells in a CD4<sup>+</sup> T cell line. (D) T cell line producing TNF- $\alpha$  and IFN- $\gamma$  was assessed by ICS in response to overnight co-culture with T2-DR4 cells and peptide LVNSVANEEGF. (E) T cell line producing IFN- $\gamma$  was assessed by ICS in response to overnight co-culture with T2-DR4 cells and peptide FNNYSPNSHSS.

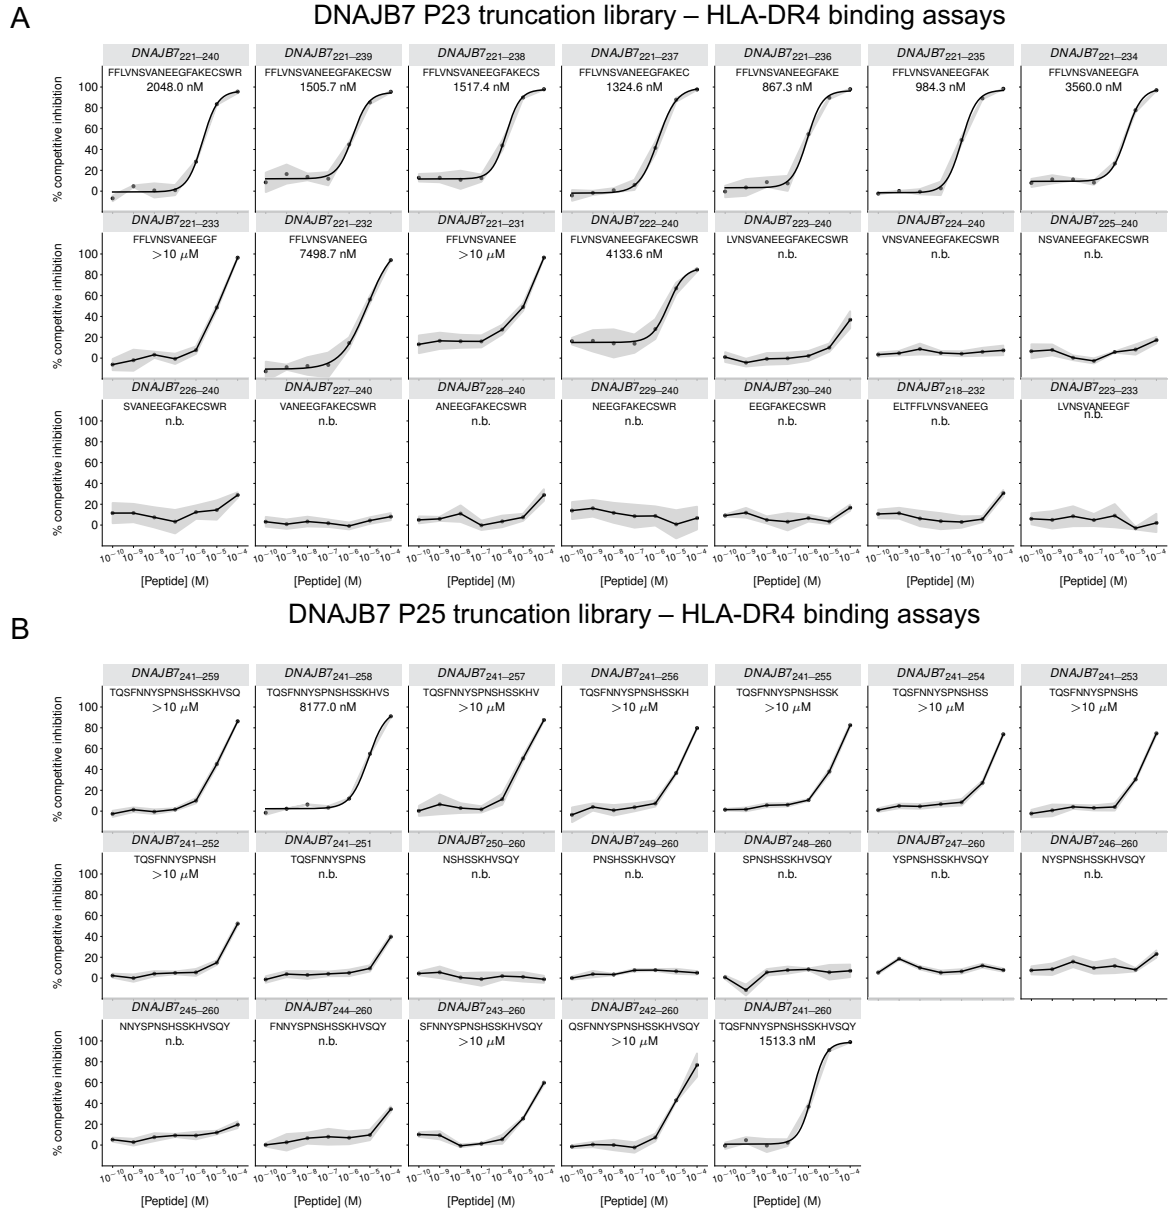

**Supplementary Figure 3. Peptide binding of truncated DNAJB7 P23 and P25 peptides to HLA-DR4 via competitive inhibition assays.** A) Competitive inhibition curves of DNAJB7 P23 truncated peptides binding to HLA-DR4. Data representative of  $n = 2-3$  independent experiments, each with  $n = 3$  technical replicates. Representative replicate is shown, presented as mean percentage inhibition (circles) with standard deviation (shaded area). An  $IC_{50}$  value defining binding (inset) is shown where fitting resulted in values of  $<10 \mu M$  (curve fit, black line). Peptides with poor curve fit and weak binding ( $>10 \mu M$ ) or no binding (n.b.) have mean values that are connected via straight lines. B) Competitive inhibition curves of DNAJB7 P25 truncated peptides binding to HLA-DR4 as described in A).



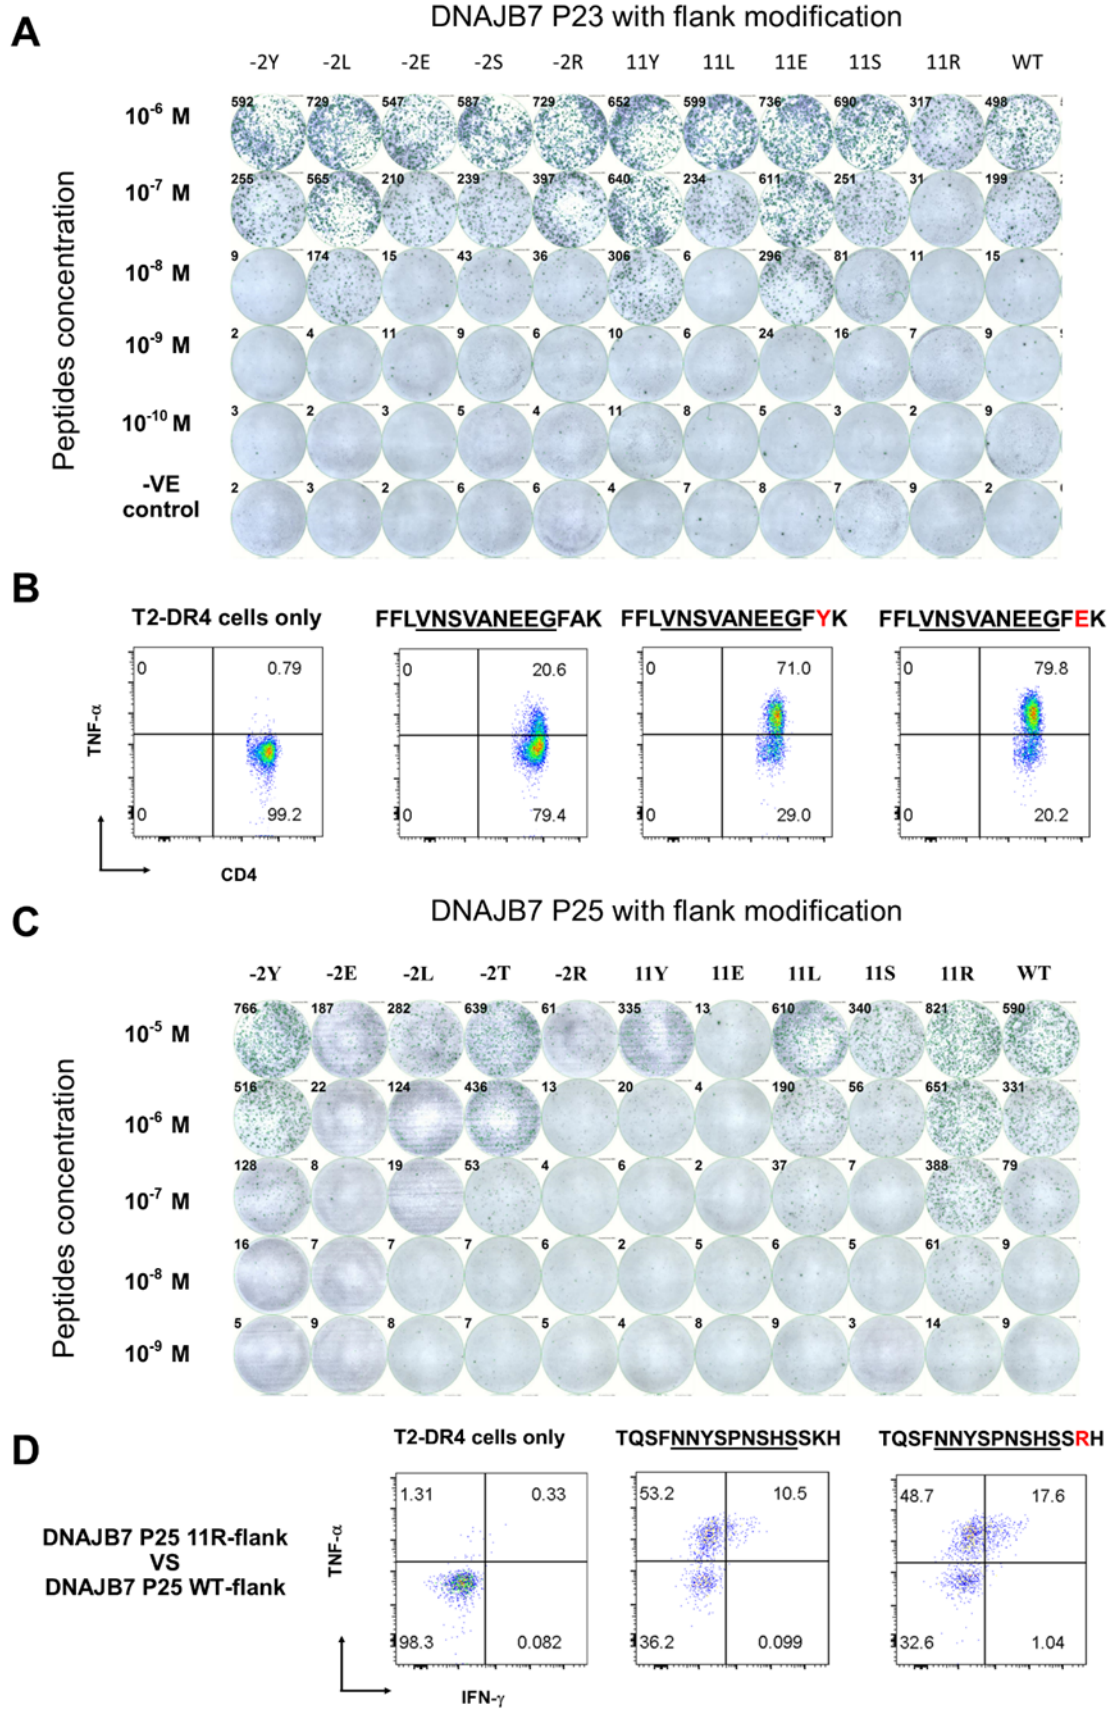

Supplementary Figure 4. Representative functional assays on P23 (DNAJB7<sub>221-240</sub>)-specific & DNAJB7<sub>241-260</sub>-specific T cell lines responding to relevant WT & variant peptides. A)

Representative IFN- $\gamma$  ELISpot results using a P23 (DNAJB7<sub>221-240</sub>)-specific T cell lines stimulated with T2-DR4 cells loaded with titrated concentrations of WT and variant peptides. (B) Dot plots representing TNF- $\alpha$  producing CD4<sup>+</sup> T cell lines specific to P23 (from HD02) cultured with DNAJB7<sub>221-235</sub> wild type peptides and modified variants-presented by T2-DR4 cells (gated on CD4<sup>+</sup> T cells). (C) Representative IFN- $\gamma$  ELISpot results using a P25 (DNAJB7<sub>241-260</sub>)-specific T cell lines stimulated with T2-DR4 cells loaded with titrated concentrations of WT and mutated peptides. (D) Representative dot plot showed intracellular cytokine responses from the P25 T cell line (from HC11) were TNF- $\alpha$  dominant (T2-DR4 cells were used as APC, cells gated on CD4<sup>+</sup>).

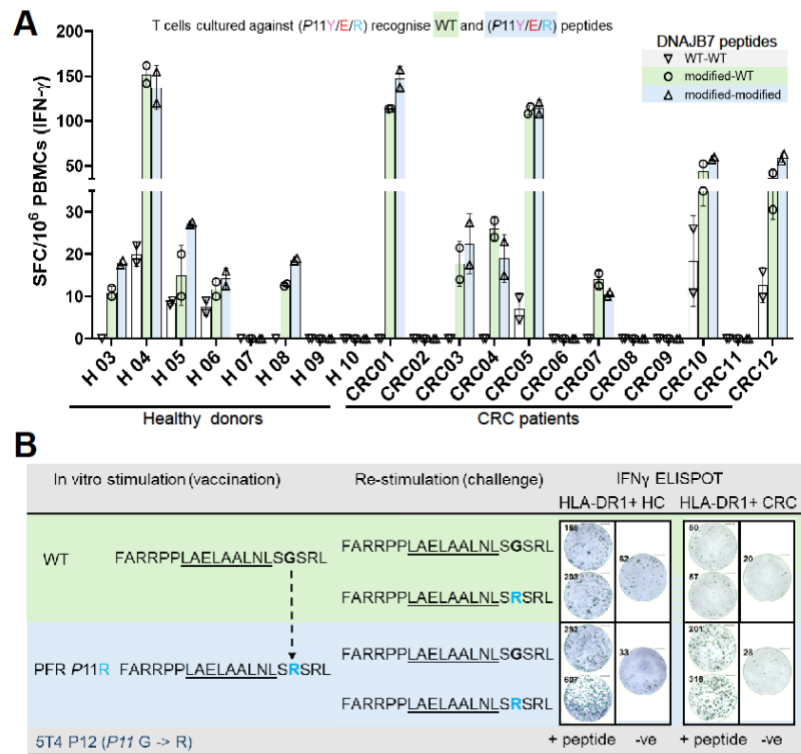

**Supplementary Figure 5. Cross over response of T cells expanded on P11 variant peptides derived from DNAJB7 and 5T4.** (A) Summary of CD4<sup>+</sup> T cell responses of 8 healthy controls and 12 CRC HLA-DR4<sup>+</sup> donors expanded on WT or P11-modified peptides. (B) Representative IFN- $\gamma$  ELISpot results of response of short-term T cell lines, from a HLA-DR1<sup>+</sup> healthy control (left) and a CRC patient (right), cultured with WT or P11R modified flank of 5T4<sub>111-130</sub>, then tested against either WT peptide or P11R variant peptides.

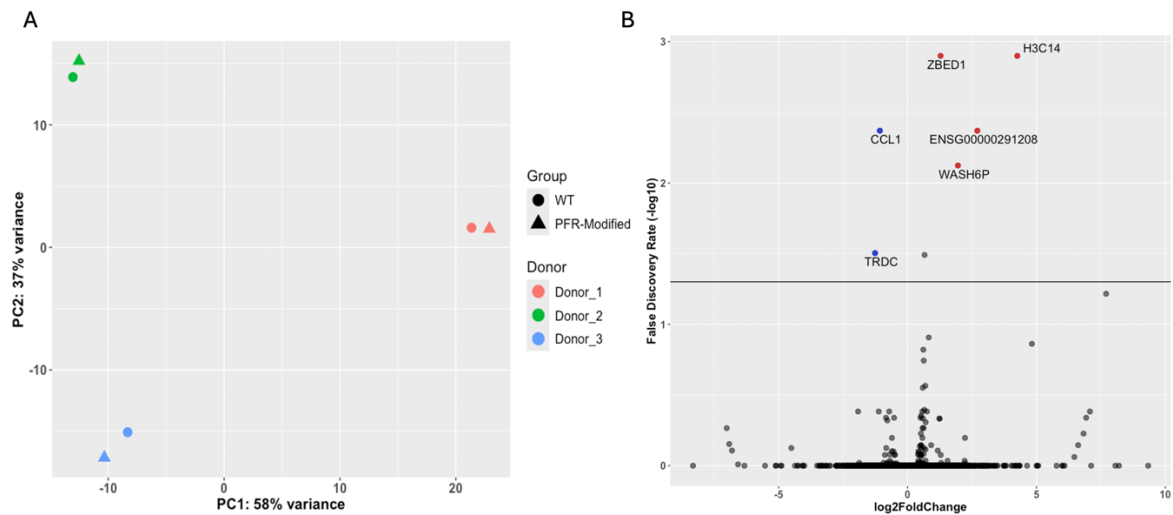

**Supplementary Figure 6. RNA-sequencing analysis of CD4<sup>+</sup> T cells restimulated with WT or PFR-modified peptides.** (A) Principal component analysis (PCA) of variance stabilizing transformation-normalized gene expression data (top 500 most variable genes) from CD4<sup>+</sup> T cells expanded and restimulated with either WT (circles) or PFR-modified (triangles) DNAJB7 (Donor\_1 and Donor\_2) and 5T4 (Donor\_3 only) peptides. Samples cluster primarily by donor indicating donor-specific transcriptional variation as the main source of variability. (B) Volcano plot showing differentially expressed genes (DEGs) between WT DNAJB7 (n = 2) and PFR-modified DNAJB7 group (n = 2) across two donors (Donor\_1 and Donor\_2). The x-axis represents log<sub>2</sub> fold change (log<sub>2</sub>FC), and the y-axis shows the  $-\log_{10}$  adjusted p-value (false discovery rate). A total of 6 genes (labelled) were significantly differentially expressed (padj < 0.05, absolute log<sub>2</sub>FC > 1), including 4 genes upregulated (red) and 2 genes downregulated (blue) in the PFR-modified condition. Upregulated: HC314: histone acetylation, ZBED1: cell proliferation; WASH6P: actin, tubulin binding; down regulated CCL1: secreted by activated T cells and displays chemotactic activity for monocytes and Tregs (via CCR8); TRDC: T cell receptor delta constant.
